# Supplementary material
Source: PubMed Central journal article supplement (PMC4859603)
Supplement: JB.00978-15_zjb999094038so1.pdf [file JB.00978-15_zjb999094038so1.pdf]

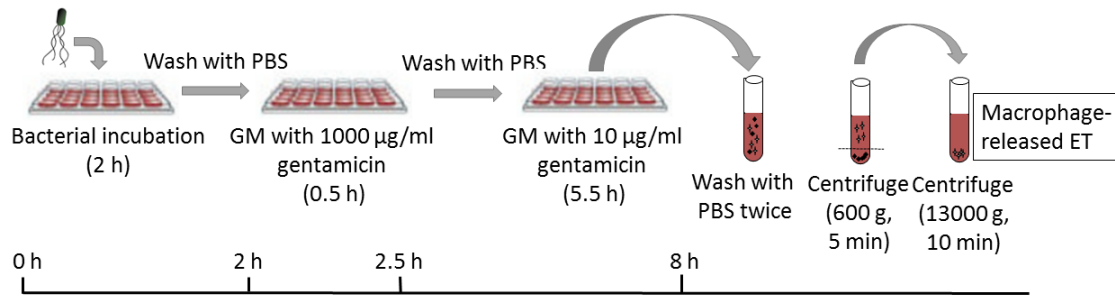

Fig S1 Preparation of macrophage-released *E. tarda*.

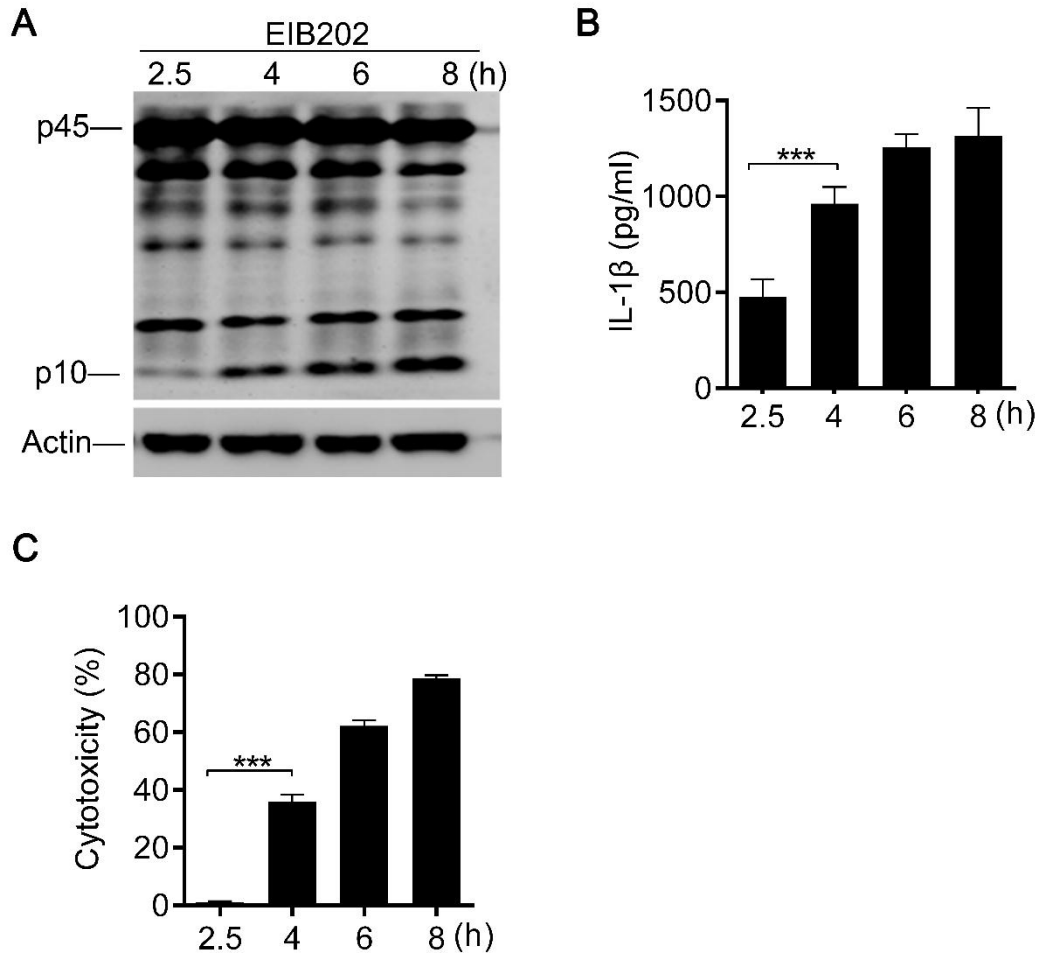

Fig S2 Activation of inflammasome in bone-marrow-derived macrophages (BMDMs) by *E. tarda*. (A) Caspase-1 activation in *E. tarda*-infected BMDMs was measured by immunoblotting. p45, procaspase-1; p10, the processed mature form of caspase-1. (B) Content of IL-1 $\beta$  in the supernatant of *E. tarda*-infected BMDMs was measured by ELISA. Error bar represents SEM \*\*\* $P < 0.001$ , test. (C) Cell death of *E. tarda*-infected BMDMs was assessed as release of lactate dehydrogenase released from *E. tarda*-infected BMDMs, detected at certain time intervals.

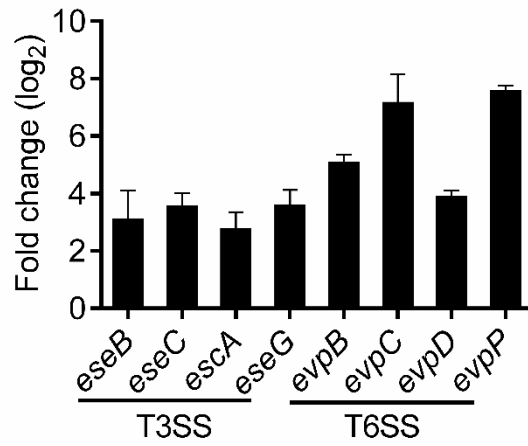

Fig S3 Real Time-PCR for indicated genes belongs to T3SS and T6SS of BMDM-released and DMEM-cultured *E. tarda*. Data are representative of at least 3 experiments. Graphs show mean  $\pm$ SD of triplicate cultures. \* $p < 0.05$ , \*\* $p < 0.01$ .

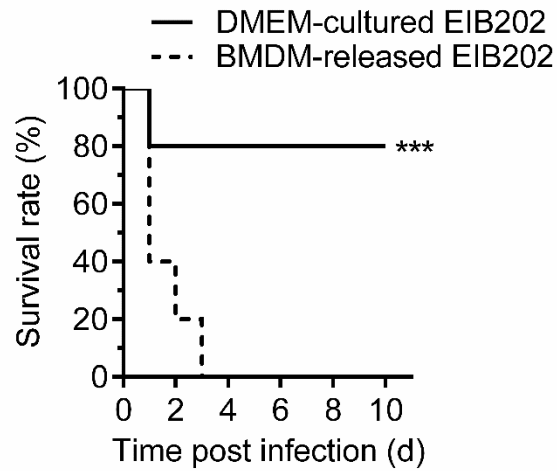

Fig S4 *E. tarda* released from BMDM cells exhibits enhanced virulence *in vivo*. Survival rate of C57BL/6 mice by intraperitoneally infected with BMDM-released or DMEM-cultured *E. tarda* ( $1.5 \times 10^6$  CFU/g, n=5 mice per group). \*\*\* $p < 0.001$ , Log-Rank test.

Table S1 Genes involved in stress response and adaptation.

| Gene                    | Function                                                                                                                 | Log <sub>2</sub> (fold_change) |
|-------------------------|--------------------------------------------------------------------------------------------------------------------------|--------------------------------|
| <b>Oxidative stress</b> |                                                                                                                          |                                |
| ETAE_2186               | thioredoxin (H-type, TRX-H)                                                                                              | 7.581313435                    |
| ETAE_0271               | coproporphyrinogen III oxidase and related Fe-S oxidoreductases                                                          | 2.135055216                    |
| ETAE_3142               | oxidoreductase molybdopterin binding                                                                                     | 3.065059011                    |
| ETAE_2070               | NADH dehydrogenase, FAD-containing subunit                                                                               | 2.205477572                    |
| ETAE_2373               | NADH:ubiquinone oxidoreductase subunit 2 (chain N)                                                                       | 2.004362629                    |
| ETAE_2375               | NADH:ubiquinone oxidoreductase subunit 5 (chain L)/multisubunit Na <sup>+</sup> /H <sup>+</sup> antiporter, MnhA subunit | 2.01233935                     |
| ETAE_2378               | formate hydrogenlyase subunit 6/NADH:ubiquinone oxidoreductase 23 kD subunit (chain I)                                   | 2.060150407                    |
| ETAE_2379               | NADH:ubiquinone oxidoreductase subunit 1 (chain H)                                                                       | 2.828952088                    |
| ETAE_2380               | NADH dehydrogenase/NADH:ubiquinone oxidoreductase 75 kD subunit (chain G)                                                | 2.250371121                    |
| <b>Acid tolerance</b>   |                                                                                                                          |                                |
| ETAE_0756               | lysine/cadaverine transporter                                                                                            | 2.213365971                    |
| ETAE_1884               | lysine/cadaverine transport protein (APC family)                                                                         | 2.922141541                    |
